# Supplementary material for: Aptamer fluorescence anisotropy assays for detection of aflatoxin B1 and adenosine triphosphate using antibody to amplify signal change
Source: Royal Society of Chemistry journal article supplement (doi:10.1039/d2ra00843b), 2022-01-01
Supplement: d2ra00843b1.pdf [file d2ra00843b1.pdf]

## Supplementary Material

### **Aptamer Fluorescence Anisotropy Assays for Detection of Aflatoxin B1 and Adenosine Triphosphate Using Antibody to Amplify Signal Change**

Yapiao Li,<sup>1,2</sup> Hao Yu,<sup>1,2</sup> Qiang Zhao<sup>1,2,3\*</sup>

1. State Key Laboratory of Environmental Chemistry and Ecotoxicology, Research Center for Eco-Environmental Sciences, Chinese Academy of Sciences, Beijing 100085, China
2. University of Chinese Academy of Sciences, Beijing 100049, China
3. School of Environment, Hangzhou Institute for Advanced Study, UCAS, Hangzhou 310000, China

\* Corresponding author

E-mail: [qiangzhao@rcees.ac.cn](mailto:qiangzhao@rcees.ac.cn)

Tel: +86-10-62849892. Fax: +86-10-62849892.

**Table S1** List of oligonucleotide sequences

| Name                      | Sequences ( 5' to 3' )                     |
|---------------------------|--------------------------------------------|
| Apt <sub>AFB</sub> -5'FAM | FAM-TGC ACG TGT TGT CTC TCT GTG TCT CGT GC |
| Apt <sub>AFB</sub> -3'FAM | TGC ACG TGT TGT CTC TCT GTG TCT CGT GC-FAM |
| C14 <sub>AFB</sub>        | AGA CAA CAC GTG CA-Digoxin                 |
| Apt <sub>ATP</sub> -5'FAM | FAM-CCT GGG GGA GTA TTG CGG AGG AAG G      |
| C11 <sub>ATP</sub>        | ACT CCC CCA GG - Digoxin                   |

**Table S2** Comparison of fluorescence polarization/anisotropy designs for detection of AFB1 and ATP with respect to affinity ligand, maximum signal change, and detection limit.

| Target | Methods                                             | Affinity ligand | Maximum signal change  | LOD     | References |
|--------|-----------------------------------------------------|-----------------|------------------------|---------|------------|
| AFB1   | Enzymes amplified FP sensing                        | aptamer         | ~0.275 (P)             | 0.24 pM | [25]       |
| AFB1   | FA assay using antibody as signal amplifier         | aptamer         | 0.138 (r); 0.173 (P)   | 25 pM   | Our assay  |
| AFB1   | FA assay using streptavidin for signal enhancement  | aptamer         | 0.146 (r); 0.188 (P)   | 60 pM   | [20]       |
| AFB1   | Direct FA assay for AFB1                            | aptamer         | 0.115 (r)              | 2 nM    | [24]       |
| AFB1   | Competitive immune-FP assay using FAM-labeled AFB1  | antibody        | No mention             | 3.2 nM  | [26]       |
| AFB1   | Competitive immune-FP assay using FAM-labeled AFB1  | antibody        | 0.050 (P)              | 42 nM   | [27]       |
| ATP    | Using quantum dots and Au nanoparticles             | aptamer         | ~0.320 (P)             | 1.8 pM  | [19]       |
| ATP    | Using silica nanoparticles for signal amplification | aptamer         | ~0.320 (P)             | 20 pM   | [16]       |
| ATP    | Using DNA-protein hybrid nanowire assembly          | aptamer         | 0.037 (r)              | 0.1 μM  | [17]       |
| ATP    | Using GO for signal amplification                   | aptamer         | ~0.316 (P)             | 0.12 μM | [30]       |
| ATP    | FA assay using streptavidin for signal enhancement  | aptamer         | 0.081 (r); 0.104 (P)   | 0.5 μM  | [20]       |
| ATP    | Competitive assay                                   | aptamer         | 0.174 (r); 0.230 (P)   | 0.5 μM  | [31]       |
| ATP    | FA assay using antibody as signal amplifier         | aptamer         | 0.060 (r); 0.080 (P)   | 1 μM    | Our assay  |
| ATP    | Direct assay using dye-labeled aptamer              | aptamer         | 0.047 (r) or 0.052 (r) | 1 μM    | [32]       |
| ATP    | Using GO for signal amplification                   | aptamer         | ~0.100 (P)             | 2 μM    | [33]       |
| ATP    | Using antibody as mass enhancer and QDs             | aptamer         | ~0.100 (P)             | 3.7 μM  | [19]       |

r is corresponding to FA, and P is corresponding to FP.

**Table S3** Comparison of EC<sub>50</sub>, Cross reactivity (CR), detection limit and detection range of AFB1, AFB2, AFM1, AFM2, AFG1 and AFG2 using this method.

| Target | EC <sub>50</sub> /nM | CR   | LOD / nM | Detection range / nM |
|--------|----------------------|------|----------|----------------------|
| AFB1   | 1.3                  | 100% | 0.025    | 0.025-100            |
| AFB2   | 1.6                  | 81%  | 0.025    | 0.025-100            |
| AFM1   | 4.2                  | 32%  | 0.39     | 0.39-100             |
| AFM2   | 4.1                  | 32%  | 0.39     | 0.39-100             |
| AFG1   | 16                   | 8%   | 1.6      | 1.56-800             |
| AFG2   | 22                   | 6%   | 1.6      | 1.56-800             |

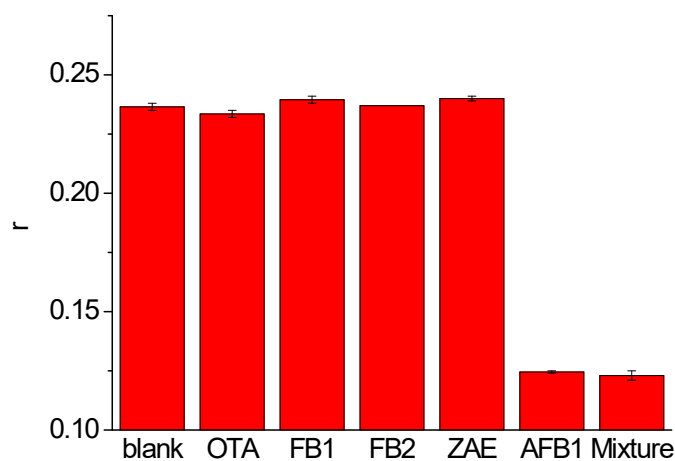

**Fig. S1.** Selectivity test of the aptamer FA sensor to AFB1 with other mycotoxins. Blank was the solution containing 1 nM Apt<sub>AFB</sub>-5'FAM and 20 nM antibody-conjugated C14<sub>AFB</sub>. AFB1 at 10 nM and the other mycotoxins at 200 nM were tested. Mixture sample contained 200 nM other mycotoxins and 10 nM AFB1.

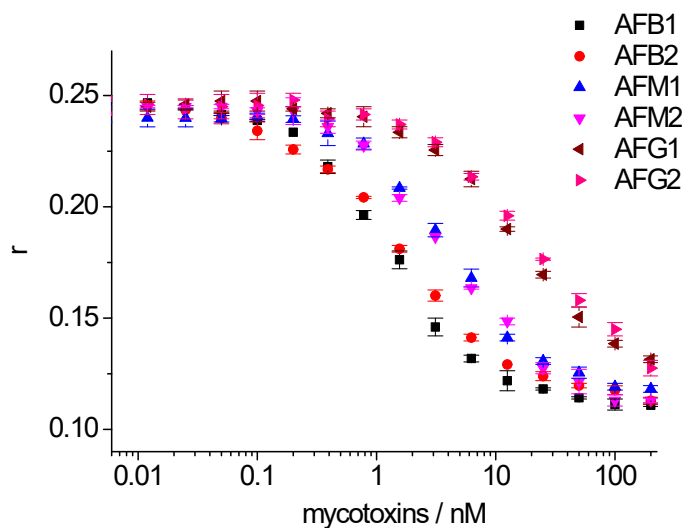

**Fig. S2.** FA responses corresponding to various concentrations of mycotoxins (such as AFB1, AFB2, AFM1, AFM2, AFG1, AFG2) in binding buffer using 1 nM Apt<sub>AFB</sub>-5'FAM and 20 nM antibody-conjugated C14<sub>AFB</sub>.

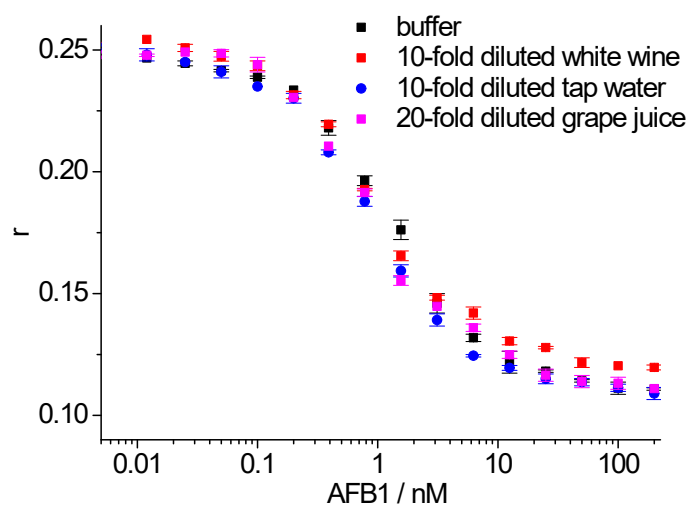

**Fig. S3.** FA values corresponding to various concentrations of AFB1 in binding buffer, 10-fold diluted white wine, 10-fold diluted tap water and 20-fold diluted grape juice samples. The concentration of Apt<sub>AFB</sub>-5'FAM and antibody-conjugated C14<sub>AFB</sub> at 3' end were 1 nM and 20 nM, respectively.

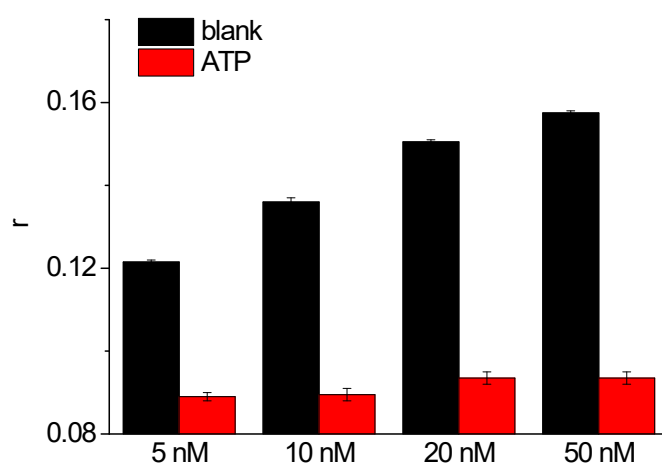

**Fig. S4.** Effects of concentrations of antibody-conjugated C11<sub>ATP</sub> on the FA values corresponding to the blank sample and the sample containing ATP (500  $\mu$ M ATP). The concentration of Apt<sub>ATP</sub>-5'FAM was 5 nM.

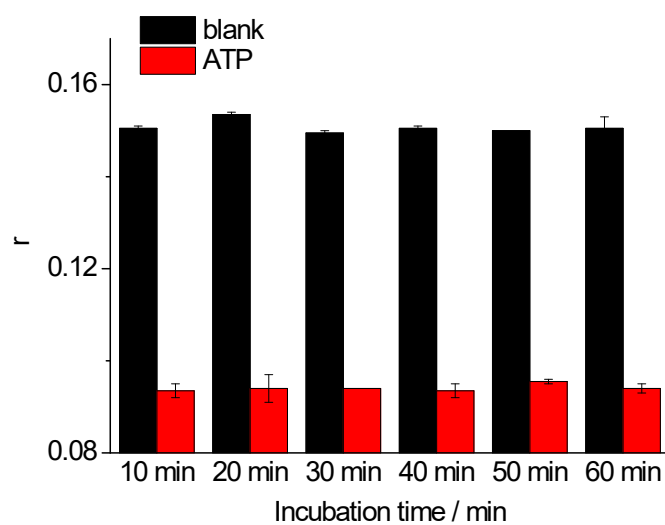

**Fig. S5.** Effects of incubation time on the FA values corresponding to the blank sample and the sample containing ATP (500  $\mu$ M ATP). The concentration of Apt<sub>ATP</sub>-5'FAM and antibody-conjugated C11<sub>ATP</sub> were 5 nM and 20 nM, respectively.

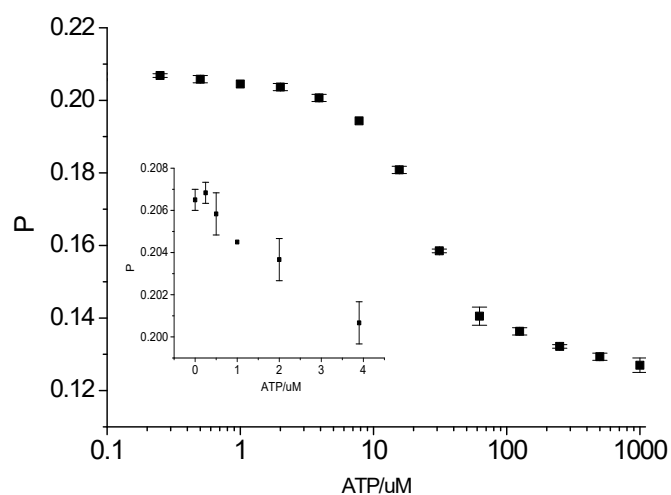

**Fig. S6.** Quantitative detection of ATP. FP responses versus the concentrations of ATP. The inset shows the FP signals corresponding to low concentrations of ATP.

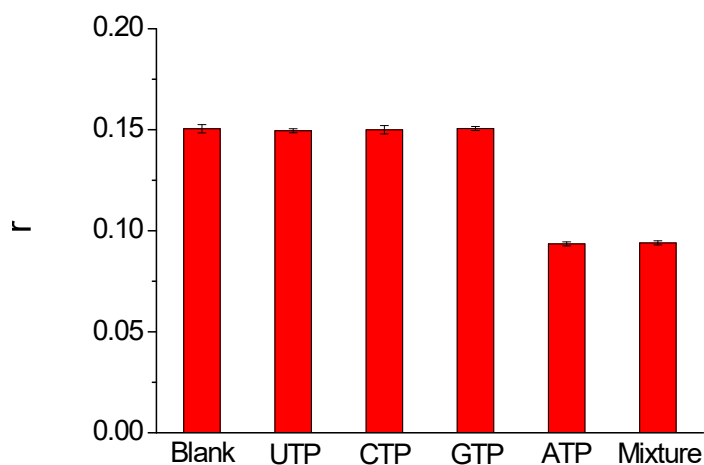

**Fig. S7.** Selectivity of the aptamer FA assay for ATP. Blank was the solution containing 5 nM Apt<sub>ATP</sub>-5'FAM and 20 nM antibody-conjugated C11<sub>ATP</sub>. ATP at 500 μM and the other small molecules at 500 μM were tested. Mixture sample contained 500 μM other small molecules and 500 μM ATP.

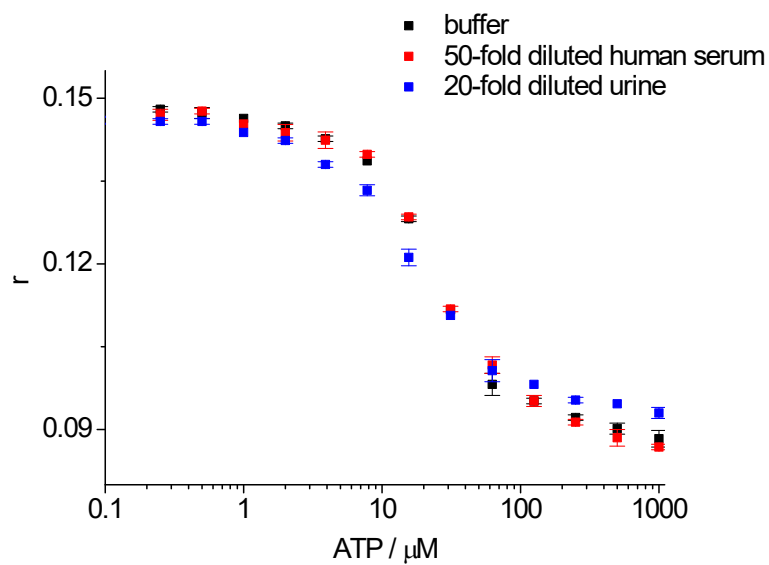

**Fig. S8.** FA values corresponding to various concentrations of ATP in binding buffer, 50-fold diluted human serum and 20-fold diluted urine samples. The concentration of  $\text{Apt}_{\text{ATP}}\text{-5'FAM}$  and antibody-conjugated  $\text{C11}_{\text{ATP}}$  were 5 nM and 20 nM, respectively.
